# Supplementary material
Source: publisher site journal article supplement (https://www.dovepress.com/article/582992)
Supplement: Supplementary file 1 [file Supplementary%20Tables.docx]

**Table S1 OM incidence in patients stratified by gender**

|  | Male | | | | Female | | | |
| --- | --- | --- | --- | --- | --- | --- | --- | --- |
|  | ≤3 years （n=123） | 3~6 years (n=65) | 6~12 years (n=25) | P | ≤3 years （n=94） | 3~6 years (n=62) | 6~12 years (n=19) | P |
| OM |  |  |  | <0.001 |  |  |  | <0.001 |
| no | 81 (65.85%) | 56 (86.15%) | 25 (100.00%) |  | 56 (59.57%) | 54 (87.10%) | 17 (89.47%) |  |
| yes | 42 (34.15%) | 9 (13.85%) | 0 (0.00%) |  | 38 (40.43%) | 8 (12.90%) | 2 (10.53%) |  |

**Table S2 OM incidence in patients stratified by age**

|  | ≤3 years | | | 3~6 years | | | 6~12 years | | |
| --- | --- | --- | --- | --- | --- | --- | --- | --- | --- |
|  | Male (n=123) | Female (n=94) | P | Male (n=65) | Female (n=62) | P | Male (n=25) | Female (n=19) | P |
| OM |  |  | 0.419 |  |  | 1.000 |  |  | 0.181 |
| no | 81 (65.85%) | 56 (59.57%) |  | 56 (86.15%) | 54 (87.10%) |  | 25 (100.00%) | 17 (89.47%) |  |
| yes | 42 (34.15%) | 38 (40.43%) |  | 9 (13.85%) | 8 (12.90%) |  | 0 (0.00%) | 2 (10.53%) |  |
